# Supplementary material for: Comorbidities and Mortality in Persons With Schizophrenia: A Swedish National Cohort Study
Source: Atypon-hosted journal article supplement (doi:10.1176/appi.ajp.2012.12050599), 2013-01-15
Supplement: 324_ds001.pdf [file 324_ds001.pdf]

**TABLE S1. Adjusted hazard ratios for association between schizophrenia (2001-2002) and all-cause mortality (2003-2007), stratified by sociodemographic factors or substance use disorders**

|                                          | N                | Adjusted HR (95% CI) <sup>a</sup> | P for interaction <sup>b</sup> |
|------------------------------------------|------------------|-----------------------------------|--------------------------------|
| <b>Sex</b>                               |                  |                                   | 0.005                          |
| Female                                   | 3,126,984 (51.3) | 2.52 (2.31, 2.74)                 |                                |
| Male                                     | 2,970,850 (48.7) | 2.10 (1.93, 2.27)                 |                                |
| <b>Age (years)</b>                       |                  |                                   | <0.001                         |
| 25-34                                    | 1,109,807 (18.2) | 2.02 (1.42, 2.88)                 |                                |
| 35-44                                    | 1,194,972 (19.6) | 1.73 (1.41, 2.12)                 |                                |
| 45-54                                    | 1,152,871 (18.9) | 1.54 (1.33, 1.78)                 |                                |
| 55-64                                    | 1,088,442 (17.9) | 1.95 (1.72, 2.22)                 |                                |
| 65-74                                    | 733,378 (12.0)   | 2.65 (2.34, 3.01)                 |                                |
| ≥75                                      | 818,364 (13.4)   | 2.25 (2.01, 2.51)                 |                                |
| <b>Marital status</b>                    |                  |                                   | 0.63                           |
| Married/cohabiting                       | 2,968,842 (48.7) | 2.63 (2.14, 3.24)                 |                                |
| Never married                            | 1,835,392 (30.1) | 1.91 (1.77, 2.06)                 |                                |
| Divorced/widowed                         | 1,244,796 (20.4) | 2.37 (2.13, 2.64)                 |                                |
| Unknown                                  | 48,804 (0.8)     | NE                                |                                |
| <b>Education level (years)</b>           |                  |                                   | 0.10                           |
| Compulsory HS or less (≤9)               | 1,266,724 (20.8) | 2.02 (1.84, 2.22)                 |                                |
| Practical or some theoretical HS (10-11) | 1,671,492 (27.4) | 1.97 (1.72, 2.26)                 |                                |
| Theoretical HS and/or college (≥12)      | 2,341,371 (38.4) | 2.75 (2.35, 3.21)                 |                                |
| Unknown                                  | 818,247 (13.4)   | 2.22 (1.98, 2.48)                 |                                |
| <b>Employment status</b>                 |                  |                                   | 0.007                          |
| Employed                                 | 3,660,931 (60.0) | 3.72 (2.61, 5.29)                 |                                |
| Non-employed                             | 2,436,903 (40.0) | 2.15 (2.03, 2.29)                 |                                |
| <b>Income</b>                            |                  |                                   | 0.16                           |
| Highest quartile                         | 1,512,614 (24.8) | 3.35 (2.43, 4.60)                 |                                |
| 2 <sup>nd</sup> quartile                 | 1,512,137 (24.8) | 2.48 (2.05, 3.01)                 |                                |
| 3 <sup>rd</sup> quartile                 | 1,512,588 (24.8) | 2.01 (1.83, 2.20)                 |                                |
| Lowest quartile                          | 1,511,701 (24.8) | 2.28 (2.09, 2.49)                 |                                |
| Unknown                                  | 48,794 (0.8)     | NE                                |                                |
| <b>Alcohol use disorder</b>              |                  |                                   | <0.001                         |
| Yes                                      | 99,441 (1.6)     | 0.98 (0.80, 1.21)                 |                                |
| No                                       | 5,998,393 (98.4) | 2.49 (2.34, 2.65)                 |                                |
| <b>Other substance use disorders</b>     |                  |                                   | <0.001                         |
| Yes                                      | 53,797 (0.9)     | 1.13 (0.90, 1.41)                 |                                |
| No                                       | 6,044,037 (99.1) | 2.38 (2.24, 2.53)                 |                                |

<sup>a</sup>Each variable is adjusted for all other variables included in this table (age was entered simultaneously as continuous and categorical variables).

<sup>b</sup>Likelihood ratio test for interaction between schizophrenia and the respective sociodemographic or substance use variable with respect to all-cause mortality.

Abbreviations: CI = confidence interval, HR = hazard ratio, HS = high school, NE = not estimable.

**TABLE S2. Standardized mortality ratios for association between schizophrenia (2001-2002) and selected cause-specific mortality (2003-2007)**

| <b>Cause of death (ICD-10 codes)</b>                       | <b>Total population<br/>(N=6,097,834)</b>  | <b>Schizophrenia<br/>(N=8,277)</b>         | <b>Adjusted for age<br/>and smoking</b> | <b>Adjusted for age, other<br/>sociodemographics<sup>a</sup>, and<br/>smoking</b> | <b>Adjusted for age, other<br/>sociodemographics<sup>a</sup>,<br/>smoking and other<br/>substance use disorders<sup>b</sup></b> |
|------------------------------------------------------------|--------------------------------------------|--------------------------------------------|-----------------------------------------|-----------------------------------------------------------------------------------|---------------------------------------------------------------------------------------------------------------------------------|
|                                                            | <b>Deaths (% of all<br/>deaths by sex)</b> | <b>Deaths (% of all<br/>deaths by sex)</b> | <b>SMR (95% CI)</b>                     | <b>SMR (95% CI)</b>                                                               | <b>SMR (95% CI)</b>                                                                                                             |
| <b>Ischemic heart disease (I20-I25)</b>                    |                                            |                                            |                                         |                                                                                   |                                                                                                                                 |
| Women                                                      | 40,764 (17.6)                              | 100 (19.3)                                 | 3.21 (2.64, 3.90)                       | 2.83 (2.33, 3.45)                                                                 | 2.81 (2.31, 3.42)                                                                                                               |
| Men                                                        | 47,405 (22.1)                              | 113 (18.7)                                 | 3.17 (2.64, 3.81)                       | 1.99 (1.66, 2.40)                                                                 | 1.93 (1.61, 2.33)                                                                                                               |
| <b>Stroke (I60-I66)</b>                                    |                                            |                                            |                                         |                                                                                   |                                                                                                                                 |
| Women                                                      | 17,520 (7.6)                               | 25 (4.8)                                   | 1.98 (1.34, 2.93)                       | 1.77 (1.19, 2.62)                                                                 | 1.76 (1.19, 2.60)                                                                                                               |
| Men                                                        | 12,196 (5.7)                               | 26 (4.3)                                   | 2.93 (1.99, 4.30)                       | 1.98 (1.34, 2.91)                                                                 | 1.92 (1.31, 2.83)                                                                                                               |
| <b>Lung cancer (C34)</b>                                   |                                            |                                            |                                         |                                                                                   |                                                                                                                                 |
| Women                                                      | 7,444 (3.2)                                | 18 (3.5)                                   | 2.26 (1.42, 3.59)                       | 1.63 (1.03, 2.59)                                                                 | 1.54 (0.97, 2.45)                                                                                                               |
| Men                                                        | 8,932 (4.2)                                | 23 (3.8)                                   | 2.50 (1.66, 3.76)                       | 1.81 (1.20, 2.73)                                                                 | 1.62 (1.07, 2.45)                                                                                                               |
| <b>Influenza or pneumonia (J09-J18)</b>                    |                                            |                                            |                                         |                                                                                   |                                                                                                                                 |
| Women                                                      | 6,365 (2.7)                                | 26 (5.0)                                   | 6.33 (4.31, 9.30)                       | 5.79 (3.93, 8.52)                                                                 | 5.77 (3.92, 8.48)                                                                                                               |
| Men                                                        | 5,412 (2.5)                                | 28 (4.6)                                   | 9.02 (6.22, 13.08)                      | 5.77 (3.97, 8.39)                                                                 | 5.74 (3.95, 8.35)                                                                                                               |
| <b>Chronic obstructive pulmonary<br/>disease (J41-J44)</b> |                                            |                                            |                                         |                                                                                   |                                                                                                                                 |
| Women                                                      | 6,175 (2.7)                                | 25 (4.8)                                   | 4.61 (3.11, 6.83)                       | 3.03 (2.04, 4.49)                                                                 | 2.78 (1.87, 4.13)                                                                                                               |
| Men                                                        | 6,343 (3.0)                                | 45 (7.5)                                   | 10.21 (7.61, 13.69)                     | 6.20 (4.60, 8.34)                                                                 | 5.50 (4.09, 7.42)                                                                                                               |

<sup>a</sup>Sociodemographic variables included marital status, education, employment status, and income.

<sup>b</sup>Substance use disorders included any outpatient or inpatient diagnosis of alcohol (F10) or other substance use (F11-F19) disorders.

Abbreviations: CI = confidence interval, SMR = standardized mortality ratio, ICD = *International Classification of Diseases*.
